# Supplementary material for: Phase II Trial of Preoperative Radiation With Concurrent Capecitabine, Oxaliplatin, and Bevacizumab Followed by Surgery and Postoperative 5-Fluorouracil, Leucovorin, Oxaliplatin (FOLFOX), and Bevacizumab in Patients With Locally Advanced Rectal Cancer: 5-Year Clinical Outcomes ECOG-ACRIN Cancer Research Group E3204
Source: Oxford University Press journal article supplement (doi:10.1634/theoncologist.2015-0106), 2015-04-29
Supplement: oncolo_20_6_615_s2.pdf [file oncolo_20_6_615_s2.pdf]

# 在局部进展期直肠癌患者中开展术前放疗联合卡培他滨、奥沙利铂和贝伐珠单抗同期治疗继以手术和术后 5-氟尿嘧啶、亚叶酸、奥沙利铂 (FOLFOX) 和贝伐珠单抗治疗的 II 期临床试验 : ECOG-ACRIN 癌症研究组 E3204 研究的 5 年临床结果

JEROME C. LANDRY,<sup>a</sup> YANG FENG,<sup>b</sup> ROSHAN S. PRABHU,<sup>c</sup> STEVEN J. COHEN,<sup>d</sup> CHARLES A. STALEY,<sup>a</sup> RICHARD WHITTINGTON,<sup>e</sup> ELIN RUTH SIGURDSON,<sup>d</sup> HALLA NIMEIRI,<sup>f</sup> UDIT VERMA,<sup>g</sup> AL BOWEN BENSON<sup>f</sup>

<sup>a</sup>Emory University, Winship Cancer Institute, Atlanta, Georgia, USA; <sup>b</sup>Dana-Farber Cancer Institute, Boston, Massachusetts, USA; <sup>c</sup>Southeast Radiation Oncology Group, Levine Cancer Institute, Charlotte, North Carolina, USA; <sup>d</sup>Fox Chase Cancer Center, Philadelphia, Pennsylvania, USA; <sup>e</sup>Veterans Affairs New Jersey Healthcare System, East Orange, New Jersey, USA; <sup>f</sup>Northwestern University, Chicago, Illinois, USA;

<sup>g</sup>University of Texas Southwestern Medical Center, Dallas, Texas, USA

Access the full results at: Landry-15-106.theoncologist.com

## 作者总结

### 摘要

**背景.** 在化疗基础上联合贝伐珠单抗可改善转移性结直肠癌患者的总生存。我们在局部进展期直肠癌患者中开展了一项 II 期临床试验，以评价术前给予卡培他滨、奥沙利铂和贝伐珠单抗联合放疗 (RT)，随后进行手术，术后给予 5-氟尿嘧啶、亚叶酸和奥沙利铂 (FOLFOX) 及贝伐珠单抗治疗。本文旨在报告该方案 5 年时的肿瘤学结果。

**方法.** 本项 II 期研究采用 Simon 二阶段设计，对下述治疗方案进行了评价：术前给予卡培他滨 (825 mg/m<sup>2</sup>, BID, 周一至周五)、奥沙利铂 (50 mg/m<sup>2</sup>, 每周一次)、贝伐珠单抗 (5 mg/kg, 第 1、15 和 29 天) 以及放疗 (50.4 Gy)；放疗后 8 周进行手术；术后 8 ~ 12 周开始给予患者 FOLFOX 方案联合贝伐珠单抗 (5 mg/kg) 每 2 周一次治疗，共 12 周期 (9 周期后停用奥沙利铂)。主要终点为病理学完全缓解 (pCR) 率达到 30%。研究在 2006 ~ 2010 年共纳入 57 例可切除的 T3/T4 期直肠腺癌患者。

**结果.** 入组的 57 例患者中有 53 例符合标准并纳入研究分析。48 例 (91%) 患者完成了术前治疗，并且接受了根治切除术。9 例 (17%) 患者达到 pCR。共发生 29 起最严

重级别为 3 级的不良事件以及 8 起最严重级别为 4 级的不良事件，2 例患者死亡 (其中 1 例归因于研究治疗)。26 例 (54%) 患者开始辅助化疗。中位随访 41 个月后，所有患者 5 年总生存 (OS) 率为 80%。仅 2 例患者癌症复发：1 例远处转移 (肝脏)，1 例局部区域复发 (盆腔淋巴结)。这 2 例患者均存活。5 年无复发生存率为 81%。

**结论.** 尽管本临床试验未能达到 pCR 的主要终点，但是获得了极好的 5 年 OS 率和无复发生存率。然而，该方案有明显的新辅助治疗毒性和手术并发症，这是系统性辅助治疗时依从性差的主要原因。由于未能改善 pCR 率、相关毒性事件较多，同时贝伐珠单抗用于结肠癌的 III 期临床试验获得了阴性结果，对该方案将不会开展进一步研究。*The Oncologist* 2015;20:615-616

### 讨论

本项术前放疗联合同期卡培他滨、奥沙利铂和贝伐珠单抗治疗，随后手术，继以术后 5-氟尿嘧啶、亚叶酸、奥沙利铂 (FOLFOX) 和贝伐珠单抗治疗的多

ClinicalTrials.gov Identifier: NCT00321685  
Sponsor(s): ECOG-ACRIN

Principal Investigator: Jerome C. Landry  
IRB Approved: Yes

Correspondence: Jerome C. Landry, M.D., Emory University, Winship Cancer Institute, 1365 Clifton Road Northeast, Atlanta, Georgia 30322, USA. Telephone: 404-778-3473; E-Mail: jland01@emory.edu Received March 17, 2015; accepted for publication March 18, 2015. ©AlphaMed Press; the data published online to support this summary is the property of the authors. <http://dx.doi.org/10.1634/theoncologist.2015-0106>

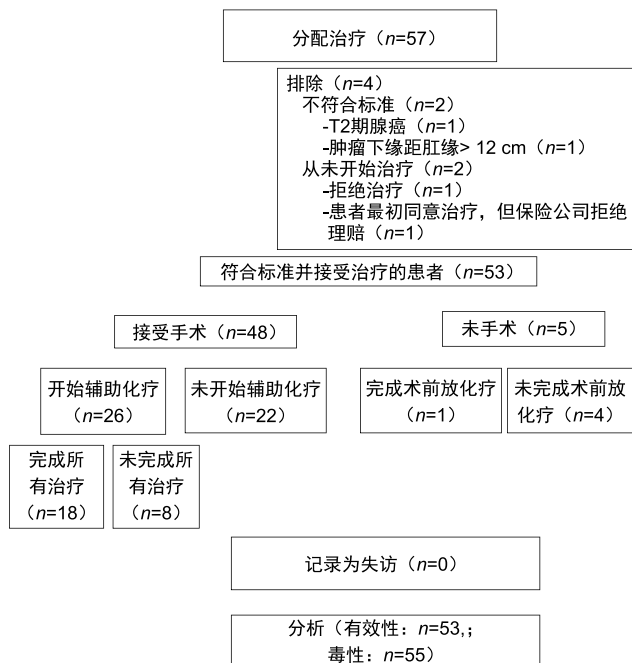

图1. 患者分布流程图。

中心II期临床试验未达到主要终点（预期病理学完全缓解率达到30%），同时伴随明显的急性毒性事件和手术并发症（主要为切口感染和切口/筋膜裂开）<sup>[1]</sup>。但是这些初步结果仅基于该治疗方案的强化新辅助部分，并不能反映研究中系统性辅助治疗的任何潜在肿瘤控制获益。

尽管本项II期临床试验中病理学CR并未增加，但与历史对照及在新辅助治疗阶段纳入奥沙利铂或贝伐珠单抗、但未使用辅助治疗或仅使用标准辅助化疗的方案相比，本研究的远处复发率非常之低。本研究的辅助治疗阶段中，在标准化疗基础上继续联合贝伐珠单抗治疗。尽管有关新辅助放疗（CRT）后的辅助化疗在局部进展期直肠癌

（LARC）患者中的作用存有一定争议<sup>[14]</sup>，但是我们的数据可能提示强化辅助治疗对减少远处复发可能有一定的效果。当然，这仅仅是一种猜想，因为本研究并未进行意向性治疗分析，而且是一个纳入患者样本量相对较小的单臂研究（图1）。同时，接受根治性切除术的48例患者中仅有26例（54%）开始辅助化疗，其中只有18例（38%）完成了所有符合方案的辅助治疗周期。无法开始辅助化疗的主要原因是新辅助CRT治疗期间的急性毒性事件和手术并发症发生率升高。此外，对于以氟尿嘧啶为基础的化疗方案联合贝伐珠单抗辅助治疗在II期或III期结肠癌切除后患者中的应用，多项临床试验获得了阴性结果，因而贝伐珠单抗用于辅助治疗的有效性受到了质疑<sup>[15,16]</sup>。最后，一项初步研究对经选择的II期或III期直肠癌患者给予新辅助化疗（不联合放疗）后实施手术，并且方案中确实也纳入了贝伐珠单抗治疗，但正在进行中的PROSPECT试验（N1048，见<http://www.ctsu.org>）出于与前述讨论类似的理由而并未使用抗血管生成制剂<sup>[17]</sup>。

总之，与历史对照和在新辅助治疗阶段使用奥沙利铂或贝伐珠单抗但未给予辅助治疗或仅给予标准辅助化疗方案的临床试验相比，本方案在远处复发率方面具有优势。然而，本方案具有明显的急性CRT毒性和手术并发症，这也是系统性辅助治疗依从性差的主要原因。由于本方案未能改善病理学CR率且毒性较大，加之在结肠癌患者中使用辅助贝伐珠单抗的III期临床试验获得了阴性结果，因此不建议开展进一步研究。

Author disclosures and references available online.
